# Supplementary material for: Controlling differentiation of stem cells via bioactive disordered cues
Source: Royal Society of Chemistry journal article supplement (doi:10.1039/d3bm00605k), 2023-01-01
Supplement: d3bm00605k1.pdf [file d3bm00605k1.pdf]

## Supplementary

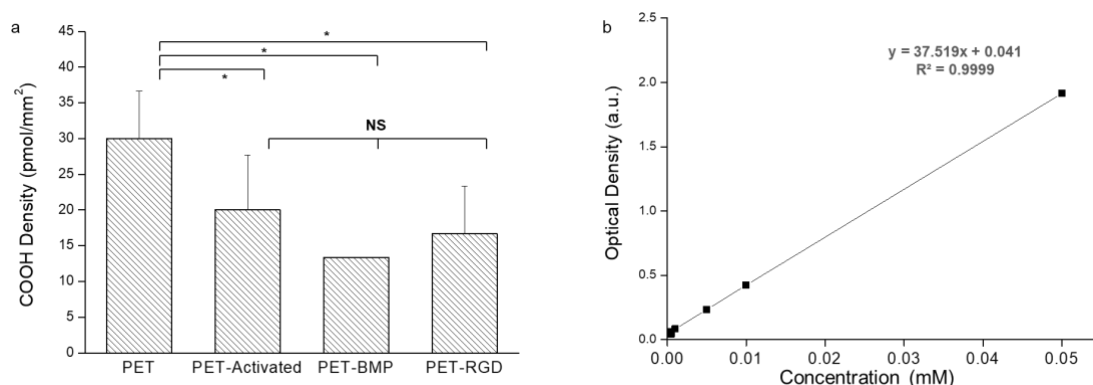

Supplementary Figure S1 a) [COOH] densities obtained by toluidine blue assay, b) Calibration curve of carboxyl group density plotted against absorbance at 633 nm

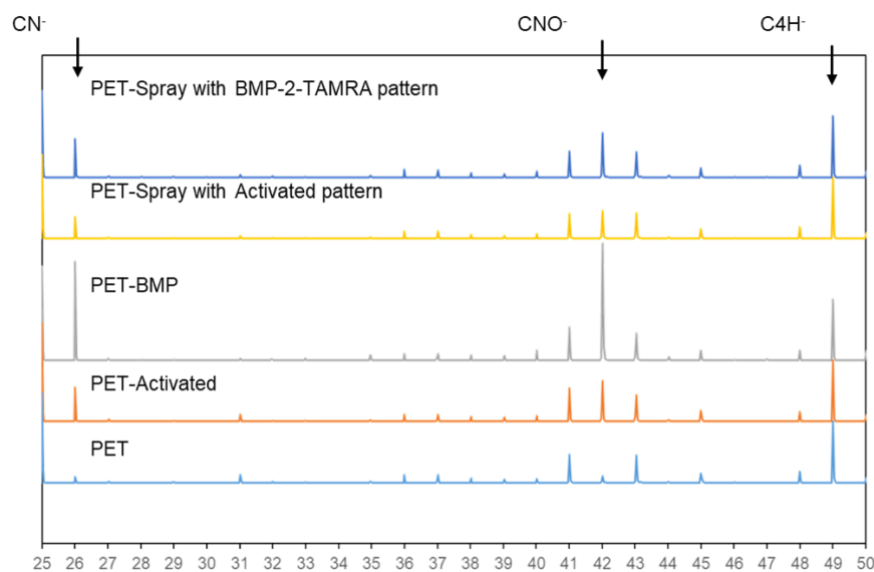

Supplementary Figure S2 The high mass resolution spectra of TOF-SIMS obtained from PET, PET-Activated, PET-BMP, PET-Spray1 with Activated pattern, PET-Spray1 with BMP-2-TAMRA pattern.

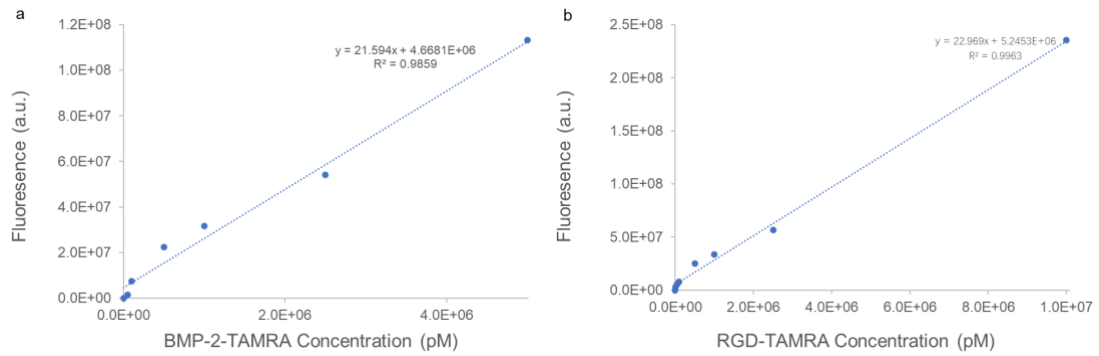

Supplementary Figure S3. Fluorescence calibration curve of BMP-2-TAMRA (a) and RGD-TAMRA (b). The fluorescence intensity is expressed as a function of the peptide density.

|   |                                       |                                |                                    |             |                                       |                                       |                                         |                                         |
|---|---------------------------------------|--------------------------------|------------------------------------|-------------|---------------------------------------|---------------------------------------|-----------------------------------------|-----------------------------------------|
| a | OPN                                   | HMSC on glass in normal medium | HMSC on glass in osteogenic medium | OB on glass | HMSC on PET-MSC1 in normal medium     | HMSC on PET-MSC2 in normal medium     | HMSC on PET-Spray2 in normal medium     | HMSC on PET-Spray3 in normal medium     |
|   | HMSC on glass in normal medium        |                                |                                    |             |                                       |                                       |                                         |                                         |
|   | HMSC on glass in osteogenic medium    | ns                             |                                    |             |                                       |                                       |                                         |                                         |
|   | OB on glass                           |                                | ns                                 |             |                                       |                                       |                                         |                                         |
|   | HMSC on PET-MSC1 in normal medium     |                                |                                    | ns          |                                       |                                       |                                         |                                         |
| b | E11                                   | HMSC on glass in normal medium | HMSC on glass in osteogenic medium | OB on glass | HMSC on PET-MSC1 in normal medium     | HMSC on PET-MSC2 in normal medium     | HMSC on PET-Spray2 in normal medium     | HMSC on PET-Spray3 in normal medium     |
|   | HMSC on glass in normal medium        |                                |                                    |             |                                       |                                       |                                         |                                         |
|   | HMSC on glass in osteogenic medium    | ns                             |                                    |             |                                       |                                       |                                         |                                         |
|   | OB on glass                           |                                | ns                                 |             |                                       |                                       |                                         |                                         |
|   | HMSC on PET-MSC1 in normal medium     |                                |                                    | ns          |                                       |                                       |                                         |                                         |
| c | SOST                                  | HMSC on glass in normal medium | HMSC on glass in osteogenic medium | OB on glass | HMSC on PET-MSC1 in normal medium     | HMSC on PET-MSC2 in normal medium     | HMSC on PET-Spray2 in normal medium     | HMSC on PET-Spray3 in normal medium     |
|   | HMSC on glass in normal medium        |                                |                                    |             |                                       |                                       |                                         |                                         |
|   | HMSC on glass in osteogenic medium    | ns                             |                                    |             |                                       |                                       |                                         |                                         |
|   | OB on glass                           |                                | ns                                 |             |                                       |                                       |                                         |                                         |
|   | HMSC on PET-MSC1 in normal medium     |                                |                                    | ns          |                                       |                                       |                                         |                                         |
| d | DMP1                                  | HMSC on glass in normal medium | HMSC on glass in osteogenic medium | OB on glass | HMSC on PET-MSC1 in normal medium     | HMSC on PET-MSC2 in normal medium     | HMSC on PET-Spray2 in normal medium     | HMSC on PET-Spray3 in normal medium     |
|   | HMSC on glass in normal medium        |                                |                                    |             |                                       |                                       |                                         |                                         |
|   | HMSC on glass in osteogenic medium    | ns                             |                                    |             |                                       |                                       |                                         |                                         |
|   | OB on glass                           |                                | ns                                 |             |                                       |                                       |                                         |                                         |
|   | HMSC on PET-MSC1 in normal medium     |                                |                                    | ns          |                                       |                                       |                                         |                                         |
| e | OPN                                   | HMSC on glass in normal medium | HMSC on glass in osteogenic medium | OB on glass | HMSC on PET-MSC1 in osteogenic medium | HMSC on PET-MSC2 in osteogenic medium | HMSC on PET-Spray2 in osteogenic medium | HMSC on PET-Spray3 in osteogenic medium |
|   | HMSC on glass in normal medium        |                                |                                    |             |                                       |                                       |                                         |                                         |
|   | HMSC on glass in osteogenic medium    | ns                             |                                    |             |                                       |                                       |                                         |                                         |
|   | OB on glass                           |                                | ns                                 |             |                                       |                                       |                                         |                                         |
|   | HMSC on PET-MSC1 in osteogenic medium |                                |                                    | ns          |                                       |                                       |                                         |                                         |
| f | E11                                   | HMSC on glass in normal medium | HMSC on glass in osteogenic medium | OB on glass | HMSC on PET-MSC1 in osteogenic medium | HMSC on PET-MSC2 in osteogenic medium | HMSC on PET-Spray2 in osteogenic medium | HMSC on PET-Spray3 in osteogenic medium |
|   | HMSC on glass in normal medium        |                                |                                    |             |                                       |                                       |                                         |                                         |
|   | HMSC on glass in osteogenic medium    | ns                             |                                    |             |                                       |                                       |                                         |                                         |
|   | OB on glass                           |                                | ns                                 |             |                                       |                                       |                                         |                                         |
|   | HMSC on PET-MSC1 in osteogenic medium |                                |                                    | ns          |                                       |                                       |                                         |                                         |
| g | DMP1                                  | HMSC on glass in normal medium | HMSC on glass in osteogenic medium | OB on glass | HMSC on PET-MSC1 in osteogenic medium | HMSC on PET-MSC2 in osteogenic medium | HMSC on PET-Spray2 in osteogenic medium | HMSC on PET-Spray3 in osteogenic medium |
|   | HMSC on glass in normal medium        |                                |                                    |             |                                       |                                       |                                         |                                         |
|   | HMSC on glass in osteogenic medium    | ns                             |                                    |             |                                       |                                       |                                         |                                         |
|   | OB on glass                           |                                | ns                                 |             |                                       |                                       |                                         |                                         |
|   | HMSC on PET-MSC1 in osteogenic medium |                                |                                    | ns          |                                       |                                       |                                         |                                         |
| h | SOST                                  | HMSC on glass in normal medium | HMSC on glass in osteogenic medium | OB on glass | HMSC on PET-MSC1 in osteogenic medium | HMSC on PET-MSC2 in osteogenic medium | HMSC on PET-Spray2 in osteogenic medium | HMSC on PET-Spray3 in osteogenic medium |
|   | HMSC on glass in normal medium        |                                |                                    |             |                                       |                                       |                                         |                                         |
|   | HMSC on glass in osteogenic medium    | ns                             |                                    |             |                                       |                                       |                                         |                                         |
|   | OB on glass                           |                                | ns                                 |             |                                       |                                       |                                         |                                         |
|   | HMSC on PET-MSC1 in osteogenic medium |                                |                                    | ns          |                                       |                                       |                                         |                                         |

Supplementary Figure S4. Statistical analysis of several differentiation markers a) OPN, b) E11, c) DMP1, d) SOST, after 2 w; and e) OPN, f) E11, g) DMP1, h) SOST, after 3 w. The statistical analysis was done by one-way analysis of variance (ANOVA) and Tukey's test for multiple comparisons. P values are represented as following \* 0.05, ns represented the mean difference was not significant at the 0.05 level.

|   |                                        |             |                                      |                                 |                                        |                                   |                                   |                                   |                                   |                                   |
|---|----------------------------------------|-------------|--------------------------------------|---------------------------------|----------------------------------------|-----------------------------------|-----------------------------------|-----------------------------------|-----------------------------------|-----------------------------------|
| a | Cell Aspect ratio                      | DS in glass | 10000 in glass in anisotropic medium | 10000 in glass in normal medium | 10000 in PET 500 in normal medium      | 10000 in PET 500 in normal medium | 10000 in PET 500 in normal medium | 10000 in PET 500 in normal medium | 10000 in PET 500 in normal medium | 10000 in PET 500 in normal medium |
|   | DS in glass                            | 0           | -                                    | -                               | -                                      | -                                 | -                                 | -                                 | -                                 | -                                 |
|   | 10000 in glass in anisotropic medium   | 0           | -                                    | -                               | -                                      | -                                 | -                                 | -                                 | -                                 | -                                 |
|   | 10000 in glass in normal medium        | -           | -                                    | -                               | -                                      | -                                 | -                                 | -                                 | -                                 | -                                 |
|   | 10000 in PET 500 in anisotropic medium | -           | -                                    | -                               | -                                      | -                                 | -                                 | -                                 | -                                 | -                                 |
|   | 10000 in PET 500 in normal medium      | -           | -                                    | -                               | -                                      | -                                 | -                                 | -                                 | -                                 | -                                 |
|   | 10000 in PET 500 in normal medium      | -           | -                                    | -                               | -                                      | -                                 | -                                 | -                                 | -                                 | -                                 |
| b | Cell Circularity                       | DS in glass | 10000 in glass in anisotropic medium | 10000 in glass in normal medium | 10000 in PET 500 in anisotropic medium | 10000 in PET 500 in normal medium |
|   | DS in glass                            | 0           | -                                    | -                               | -                                      | -                                 | -                                 | -                                 | -                                 | -                                 |
|   | 10000 in glass in anisotropic medium   | 0           | -                                    | -                               | -                                      | -                                 | -                                 | -                                 | -                                 | -                                 |
|   | 10000 in glass in normal medium        | -           | -                                    | -                               | -                                      | -                                 | -                                 | -                                 | -                                 | -                                 |
|   | 10000 in PET 500 in normal medium      | -           | -                                    | -                               | -                                      | -                                 | -                                 | -                                 | -                                 | -                                 |
|   | 10000 in PET 500 in anisotropic medium | -           | -                                    | -                               | -                                      | -                                 | -                                 | -                                 | -                                 | -                                 |
|   | 10000 in PET 500 in normal medium      | -           | -                                    | -                               | -                                      | -                                 | -                                 | -                                 | -                                 | -                                 |
| c | Cell Anisotropy                        | DS in glass | 10000 in glass in anisotropic medium | 10000 in glass in normal medium | 10000 in PET 500 in anisotropic medium | 10000 in PET 500 in normal medium |
|   | DS in glass                            | 0           | -                                    | -                               | -                                      | -                                 | -                                 | -                                 | -                                 | -                                 |
|   | 10000 in glass in anisotropic medium   | 0           | -                                    | -                               | -                                      | -                                 | -                                 | -                                 | -                                 | -                                 |
|   | 10000 in glass in normal medium        | -           | -                                    | -                               | -                                      | -                                 | -                                 | -                                 | -                                 | -                                 |
|   | 10000 in PET 500 in normal medium      | -           | -                                    | -                               | -                                      | -                                 | -                                 | -                                 | -                                 | -                                 |
|   | 10000 in PET 500 in anisotropic medium | -           | -                                    | -                               | -                                      | -                                 | -                                 | -                                 | -                                 | -                                 |
|   | 10000 in PET 500 in normal medium      | -           | -                                    | -                               | -                                      | -                                 | -                                 | -                                 | -                                 | -                                 |
| d | Cell Aspect ratio                      | DS in glass | 10000 in glass in anisotropic medium | 10000 in glass in normal medium | 10000 in PET 500 in anisotropic medium | 10000 in PET 500 in normal medium |
|   | DS in glass                            | 0           | -                                    | -                               | -                                      | -                                 | -                                 | -                                 | -                                 | -                                 |
|   | 10000 in glass in anisotropic medium   | 0           | -                                    | -                               | -                                      | -                                 | -                                 | -                                 | -                                 | -                                 |
|   | 10000 in glass in normal medium        | -           | -                                    | -                               | -                                      | -                                 | -                                 | -                                 | -                                 | -                                 |
|   | 10000 in PET 500 in normal medium      | -           | -                                    | -                               | -                                      | -                                 | -                                 | -                                 | -                                 | -                                 |
|   | 10000 in PET 500 in anisotropic medium | -           | -                                    | -                               | -                                      | -                                 | -                                 | -                                 | -                                 | -                                 |
|   | 10000 in PET 500 in normal medium      | -           | -                                    | -                               | -                                      | -                                 | -                                 | -                                 | -                                 | -                                 |
| e | Cell Circularity                       | DS in glass | 10000 in glass in anisotropic medium | 10000 in glass in normal medium | 10000 in PET 500 in anisotropic medium | 10000 in PET 500 in normal medium |
|   | DS in glass                            | 0           | -                                    | -                               | -                                      | -                                 | -                                 | -                                 | -                                 | -                                 |
|   | 10000 in glass in anisotropic medium   | 0           | -                                    | -                               | -                                      | -                                 | -                                 | -                                 | -                                 | -                                 |
|   | 10000 in glass in normal medium        | -           | -                                    | -                               | -                                      | -                                 | -                                 | -                                 | -                                 | -                                 |
|   | 10000 in PET 500 in normal medium      | -           | -                                    | -                               | -                                      | -                                 | -                                 | -                                 | -                                 | -                                 |
|   | 10000 in PET 500 in anisotropic medium | -           | -                                    | -                               | -                                      | -                                 | -                                 | -                                 | -                                 | -                                 |
|   | 10000 in PET 500 in normal medium      | -           | -                                    | -                               | -                                      | -                                 | -                                 | -                                 | -                                 | -                                 |
| f | Cell Anisotropy                        | DS in glass | 10000 in glass in anisotropic medium | 10000 in glass in normal medium | 10000 in PET 500 in anisotropic medium | 10000 in PET 500 in normal medium |
|   | DS in glass                            | 0           | -                                    | -                               | -                                      | -                                 | -                                 | -                                 | -                                 | -                                 |
|   | 10000 in glass in anisotropic medium   | 0           | -                                    | -                               | -                                      | -                                 | -                                 | -                                 | -                                 | -                                 |
|   | 10000 in glass in normal medium        | -           | -                                    | -                               | -                                      | -                                 | -                                 | -                                 | -                                 | -                                 |
|   | 10000 in PET 500 in normal medium      | -           | -                                    | -                               | -                                      | -                                 | -                                 | -                                 | -                                 | -                                 |
|   | 10000 in PET 500 in anisotropic medium | -           | -                                    | -                               | -                                      | -                                 | -                                 | -                                 | -                                 | -                                 |
|   | 10000 in PET 500 in normal medium      | -           | -                                    | -                               | -                                      | -                                 | -                                 | -                                 | -                                 | -                                 |

Supplementary Figure S5. Statistical analysis of several cell morphology a) aspect ratio, b) circularity, c) anisotropy, after 2 w; and d) aspect ratio, e) circularity, f) anisotropy, after 3 w. The statistical analysis was done by one-way analysis of variance (ANOVA) and Tukey's test for multiple comparisons. P values are represented as following \* 0.05,). N represented the mean difference was not significant at the 0.05 level.
